# Supplementary material
Source: PubMed Central journal article supplement (PMC4054126)
Supplement: AEM.03923-13_zam999105339so1.pdf [file AEM.03923-13_zam999105339so1.pdf]

1 **Supplementary material**

2

| Mixture no. | 1   | 2  | 3  | 4  | 5  | 6  | 7  | 8  | 9  | 10 | 11  |
|-------------|-----|----|----|----|----|----|----|----|----|----|-----|
| B.t (%)     | 100 | 99 | 97 | 90 | 75 | 50 | 25 | 10 | 3  | 1  | 0   |
| C.g (%)     | 0   | 1  | 3  | 10 | 25 | 50 | 75 | 90 | 97 | 99 | 100 |

3

4 Supplementary figure S1. Ratios of 16S rRNA gene mixtures used in the HRM sensitivity  
5 assay. Bacteria used were *Bacillus thuringiensis* (B.t) and *Corynebacterium glutamicum*  
6 (C.g).

7

8

9

10

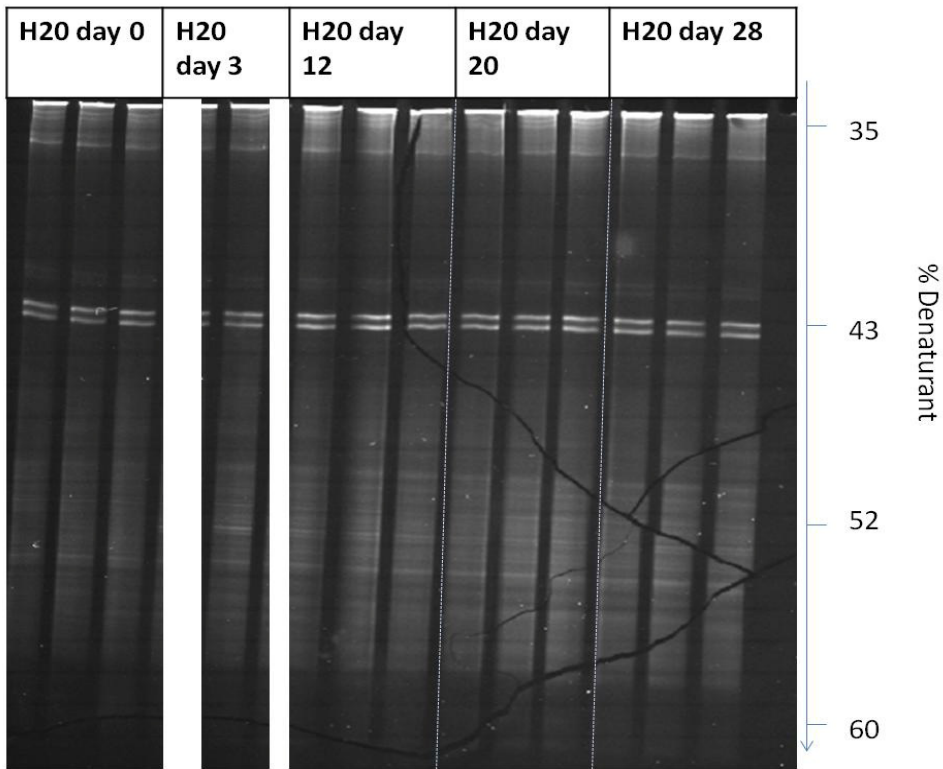

11

12 Supplementary figure S2. DGGE gel loaded with PCR amplified 16S rRNA gene fragments  
 13 of “H<sub>2</sub>O day 0” control DNA samples. The DNA of two of the “H<sub>2</sub>O day 3” samples was not  
 14 extracted successfully and is therefore not included.

15

16

17

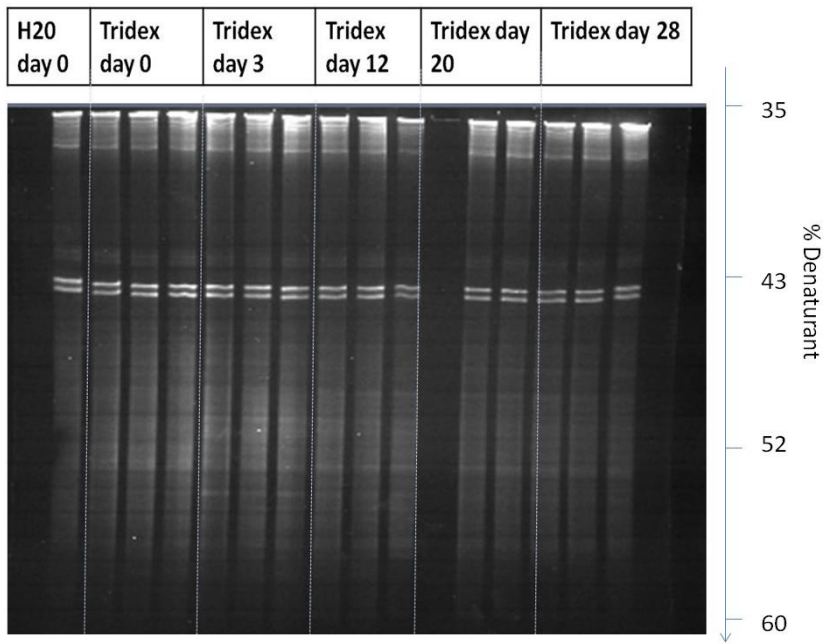

18

19 Supplementary figure S3. DGGE gel loaded with PCR amplified 16S rRNA gene fragments  
 20 of Tridex DNA samples. “H<sub>2</sub>O day 0” control sample in far left lane is used as a standard. The  
 21 DNA of one of the “Tridex day 20” samples was not extracted successfully and is therefore  
 22 not included.

23

24
